# Supplementary material for: Structure–function analysis and genetic interactions of the Yhc1, SmD3, SmB, and Snp1 subunits of yeast U1 snRNP and genetic interactions of SmD3 with U2 snRNP subunit Lea1
Source: PubMed Central journal article supplement — RNA. 2015 Jun;21(6):1173–86. doi: 10.1261/rna.050583.115 (PMC4436669; doi:10.1261/rna.050583.115), 2015-06
Supplement: supp_050583.115_SuppMaterial.pdf [file supp_050583.115_SuppMaterial.pdf]

Supplemental Material

**Structure-function analysis and genetic interactions of the Yhc1, SmD3, SmB, and Snp1 subunits of yeast U1 snRNP and genetic interactions of SmD3 with U2 snRNP subunit Lea1**

Beate Schwer and Stewart Shuman

Supplemental Figures: S1, S2, S3, S4 S5, S6, S7, S8

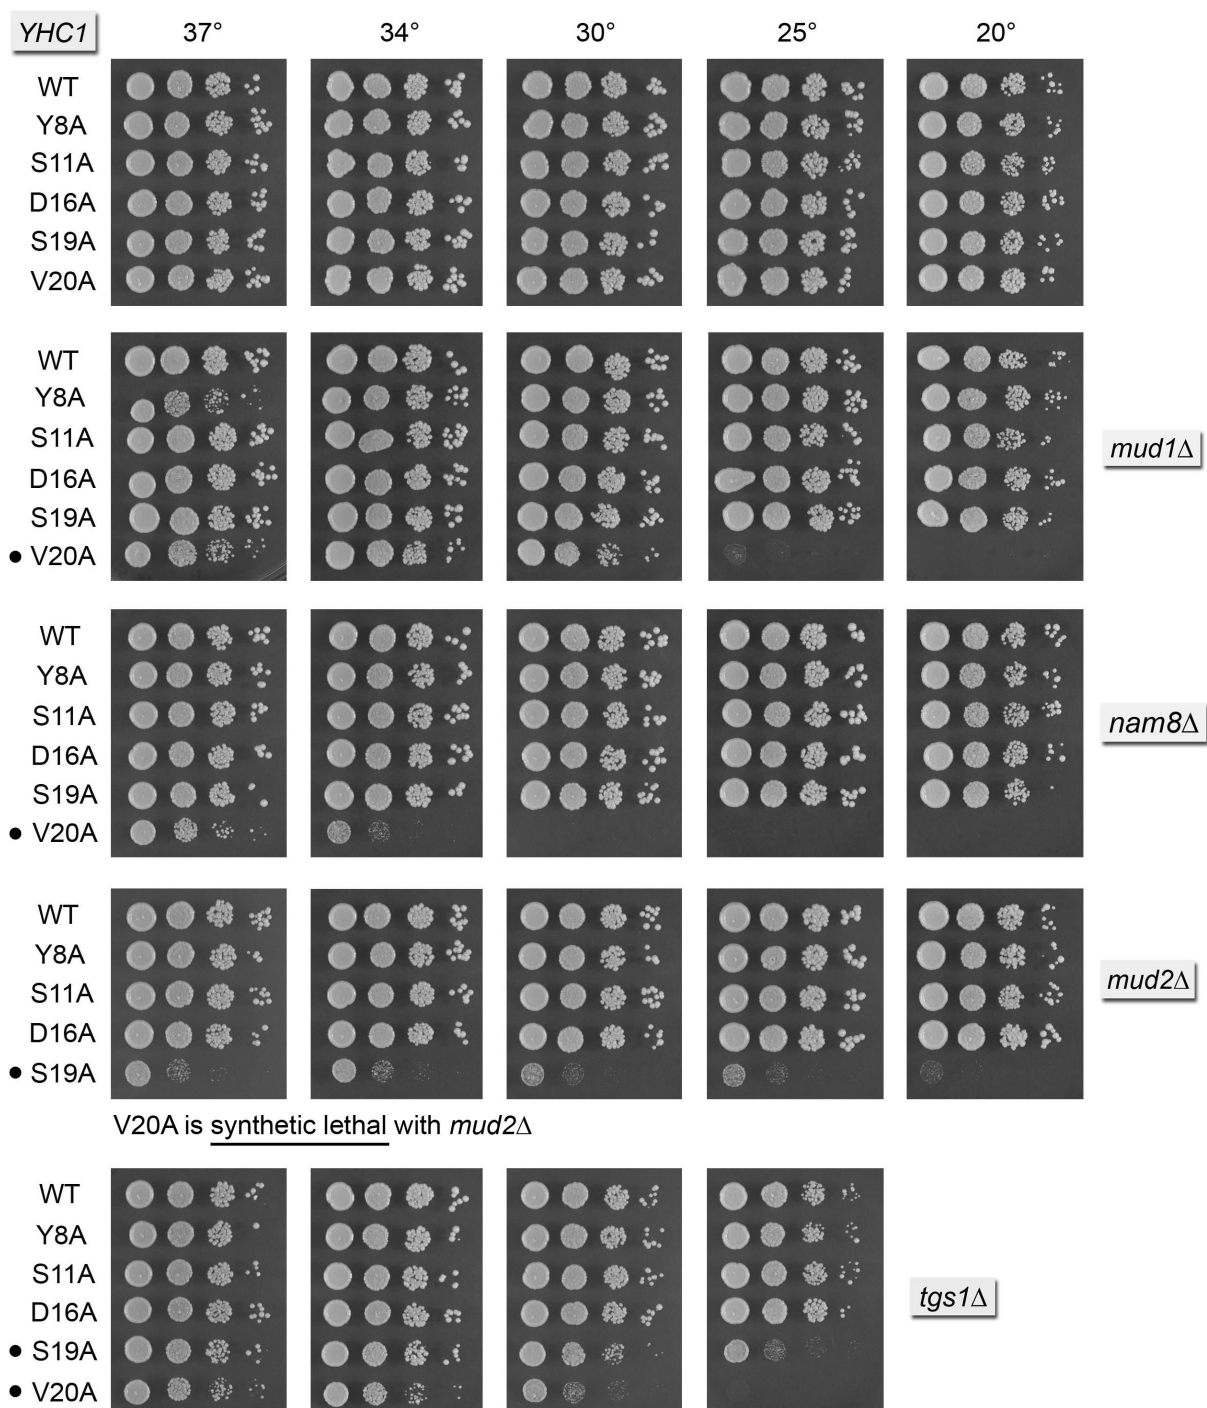

Figure S1. Genetic interactions of *YHC1-Ala* alleles. Yeast *yhclΔ* strains bearing the indicated *YHC1-Ala* alleles on a *CEN HIS3* plasmid in an otherwise wild-type (top panel), *mud1Δ*, *nam8Δ*, *mud2Δ*, or *tgs1Δ* background as indicated were spot-tested for growth on YPD agar at the temperatures specified. Synthetic growth defects are denoted by •.

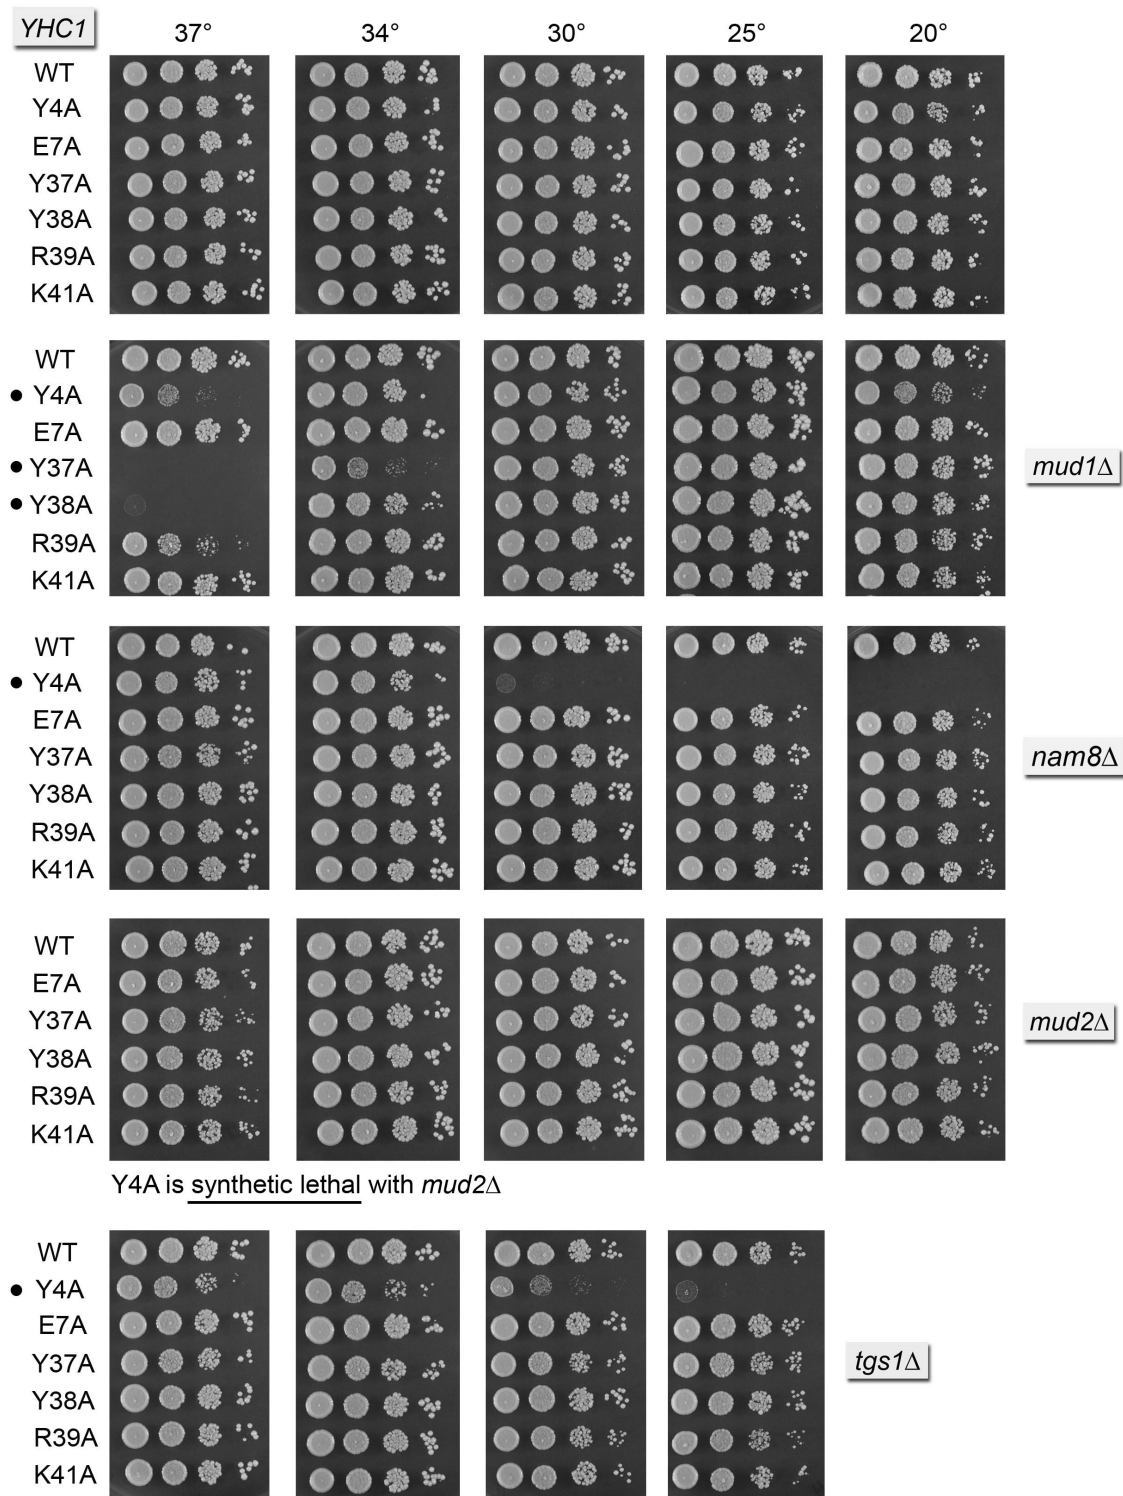

Figure S2. Genetic interactions of *YHC1-Ala* alleles. Yeast *yhclΔ* strains bearing the indicated *YHC1-Ala* alleles on a *CEN HIS3* plasmid in an otherwise wild-type (top panel), *mud1Δ*, *nam8Δ*, *mud2Δ*, or *tgs1Δ* background as indicated were spot-tested for growth on YPD agar at the temperatures specified. Synthetic growth defects are denoted by •.

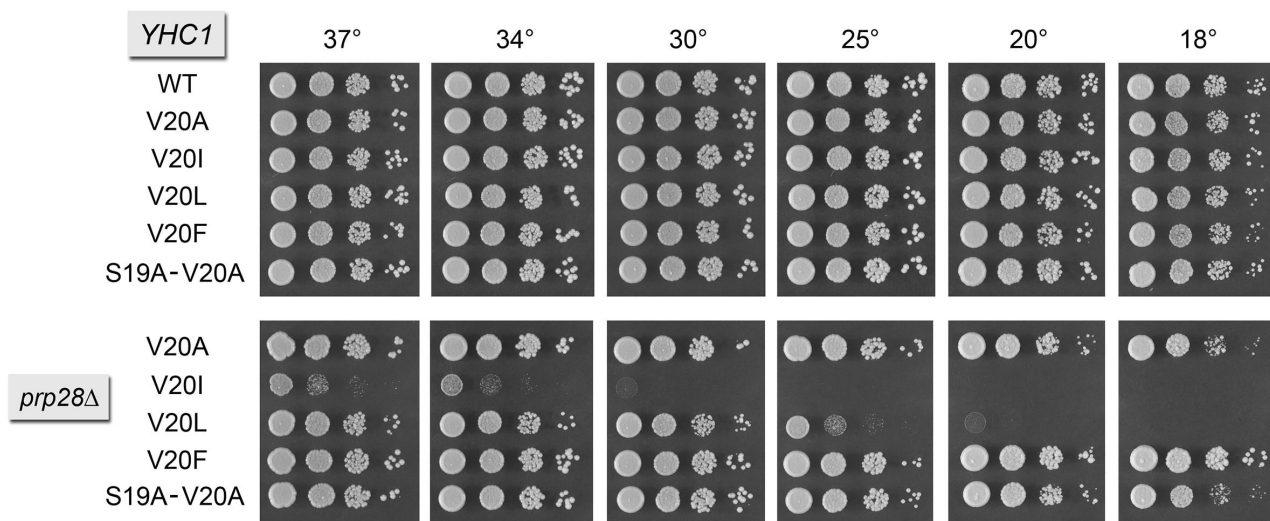

Figure S3. Val20 mutations bypass Prp28. Complementation of *yhc1Δ* (*top panel*). Yeast *yhc1Δ* strains bearing the indicated *YHC1-Ala* alleles were spot-tested for growth on YPD agar at the temperatures specified. Prp28 bypass (*bottom panel*). Yeast *prp28Δ yhc1Δ* cells bearing the indicated *YHC1* allele on a *CEN LEU2* plasmid were spot-tested for growth on YPD agar at the temperatures specified.



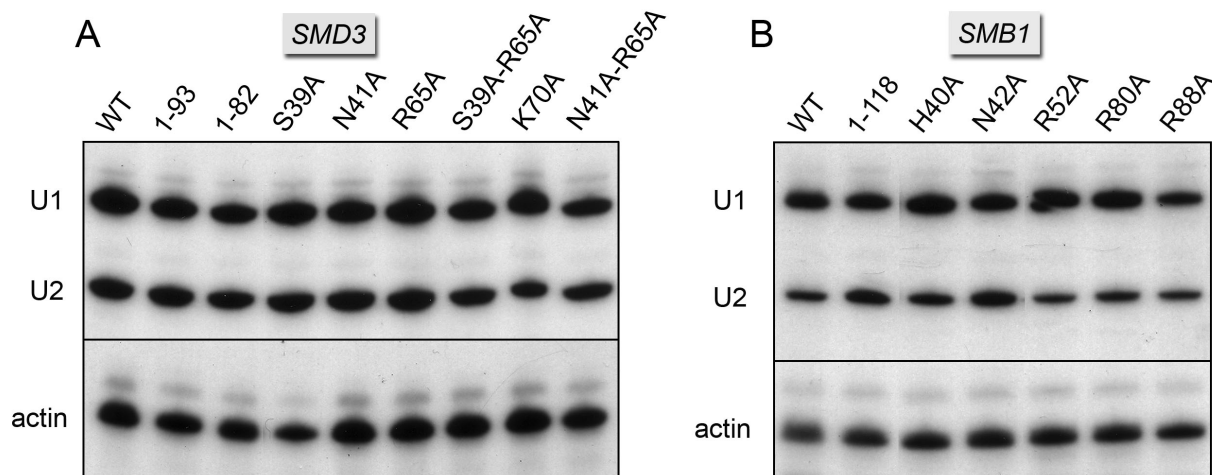

Figure S4. Primer extension analysis of U1 and U2 snRNA levels. Primer extension reactions with a  $^{32}\text{P}$ -labeled primers complementary to U1 snRNA, U2 snRNA, and actin mRNA were performed as described previously (Schwer et al. 2013) using as template total cellular RNA isolated from the indicated *SMD3* and *SMB1* strains. The reaction products were analyzed by denaturing PAGE and visualized by autoradiography. All lanes in the U1+U2 or actin image panels are from the same gel and autoradiographic exposure, from which intervening lanes were cropped (e.g. between 1-82 and S39A in A; between 1-118 and H40A and between N42 and R52A in B) and the flanking lanes moved laterally.

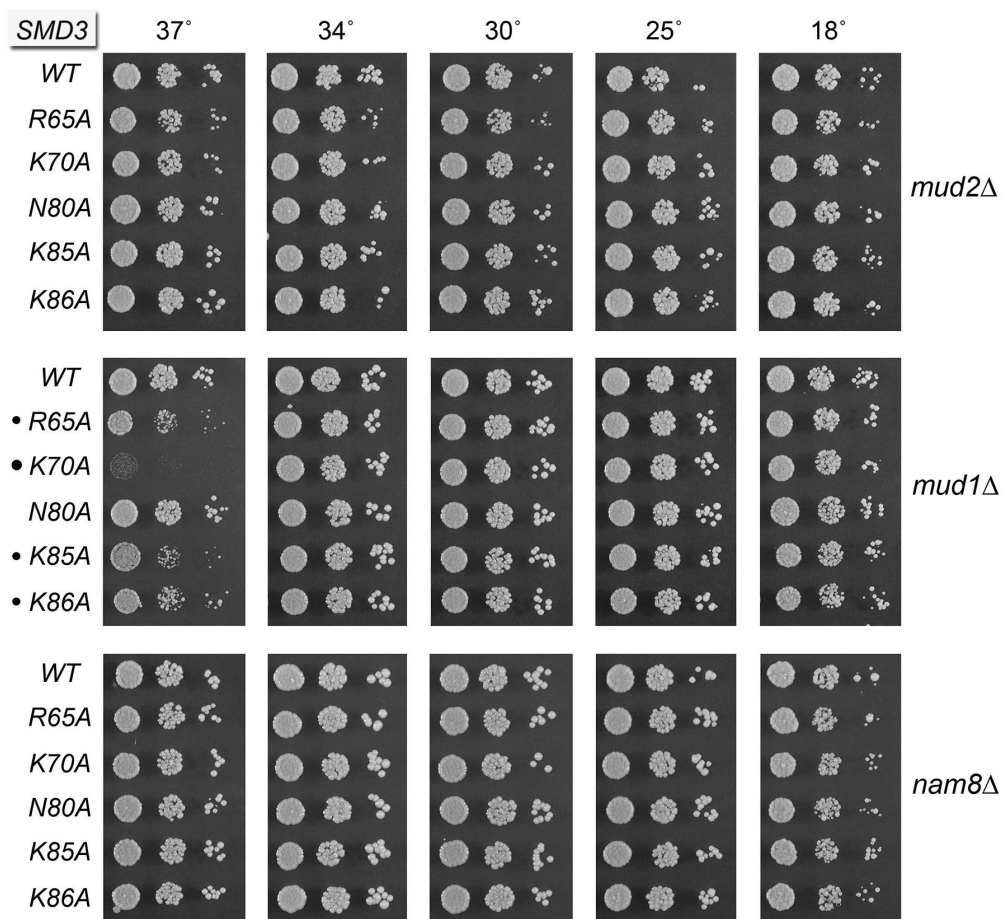

Figure S5. Tests of mutation synergy of *SMD3-Ala* alleles. Yeast *smd3Δ* strains bearing the indicated *SMD3-Ala* alleles on a *CEN LEU2* plasmid in *mud2Δ*, *mud1Δ*, or *nam8Δ* backgrounds as indicated were spot-tested for growth on YPD agar at the temperatures specified. Synthetic growth defects are denoted by •.

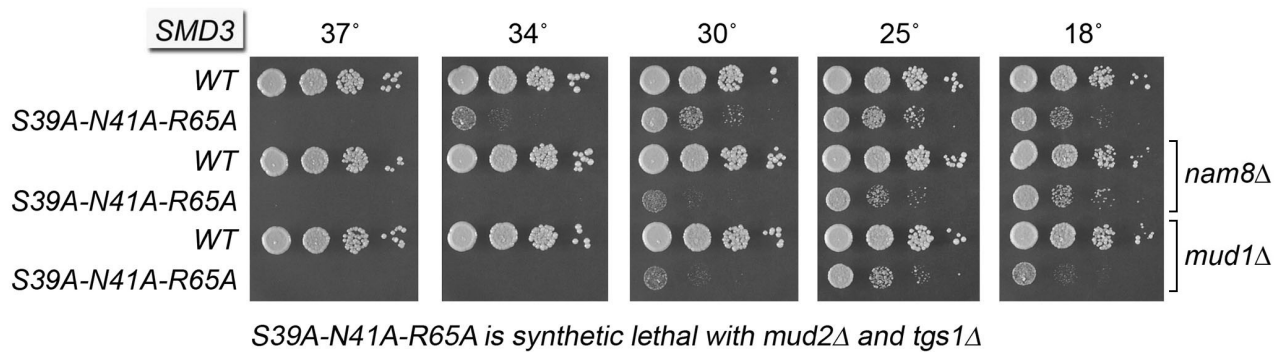

Figure S6. Phenotype and mutational synergies of *SMD3-S39A-N41A-R65A*. Yeast *smd3Δ* strains bearing *SMD3* (WT) or *SMD3-S39A-N41A-R65A* alleles on a *CEN LEU2* plasmid in an otherwise wild-type (top two rows), *nam8Δ*, or *mud1Δ* background, as indicated, were spot-tested for growth on YPD agar at the temperatures specified. *SMD3-S39A-N41A-R65A* was lethal in the *mud2Δ* and *tgs1Δ* strains.

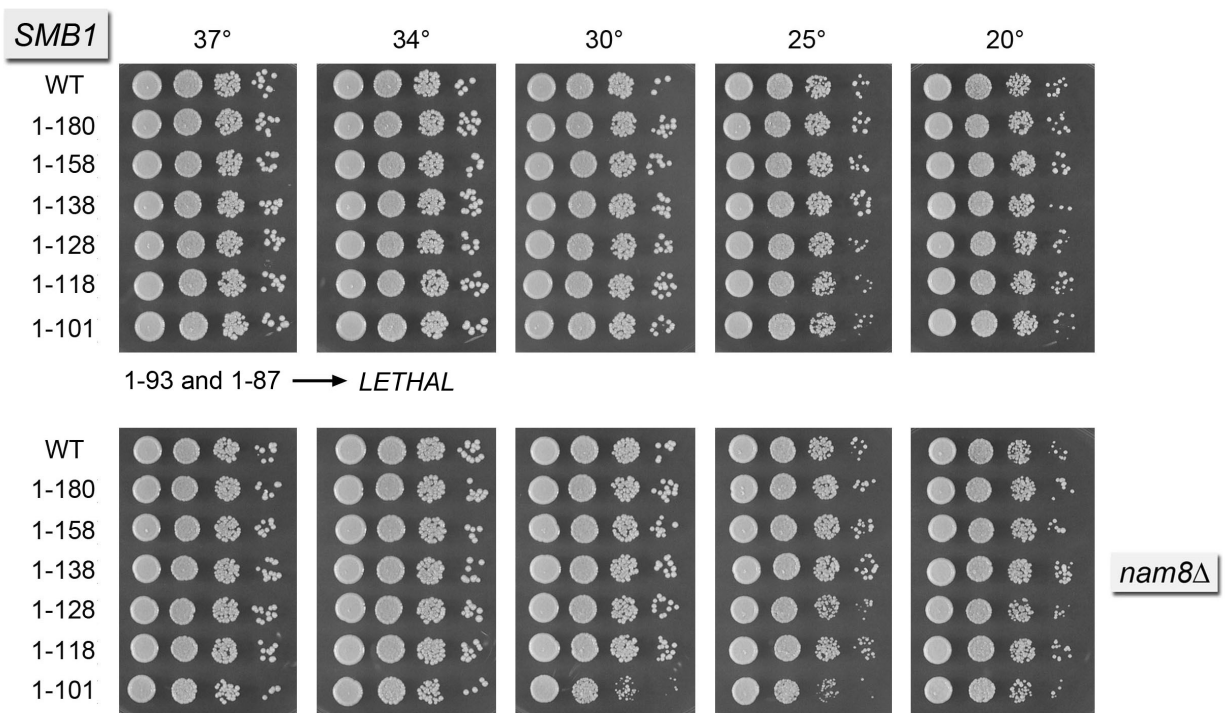

Figure S7. C-terminal truncations demarcate a minimized functional SmB. Wild-type *SMB1* and the series of C-terminally truncated *SMB1* alleles on *CEN HIS3* plasmids were tested for activity by plasmid shuffle in *smb1Δ* (top panel) and *smb1Δ nam8Δ* strains (bottom panel). *SMB1*-(1-93) and *SMB1*-(1-87) failed to complement *smb1Δ* in the plasmid shuffle assay and were deemed lethal. The growth phenotypes of the indicated viable FOA-resistant strains were spot tested for growth on YPD agar at the temperatures specified.

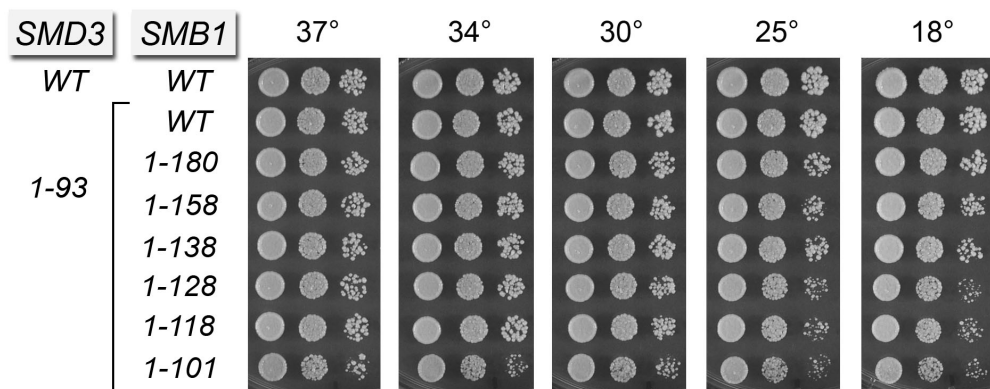

Figure S8. Lack of strong mutational synergies between Smd3 and SmB C-terminal truncations. *SMD3* (WT) and *SMD3*-(1-93) alleles on *CEN LEU2* plasmids were co-transformed with *SMB1* (WT) and *SMB1-ΔC* alleles on *CEN HIS3* plasmids into a yeast *smd3Δ smb1Δ p(CEN URA3 SMD3 SMB1)* strain. The growth phenotypes of the indicated viable FOA-resistant strains recovered after plasmid shuffle were spot tested for growth on YPD agar at the temperatures specified.
